# Supplementary material
Source: Springer Nature journal article supplement (https://www.springermedizin.de/resource/supplementary/12974_2010_281_MOESM4_ESM.pdf/9601154)

**A**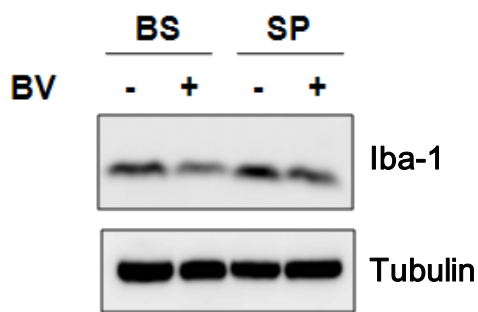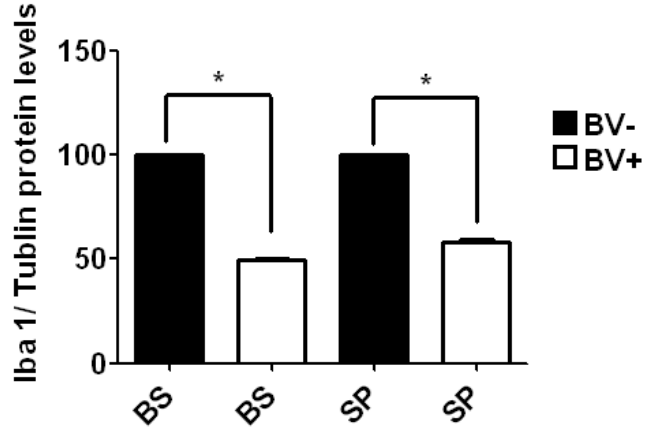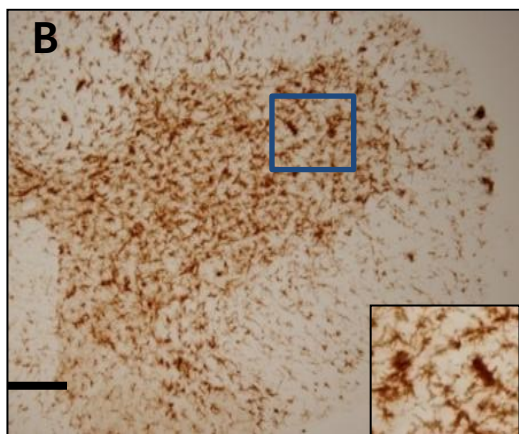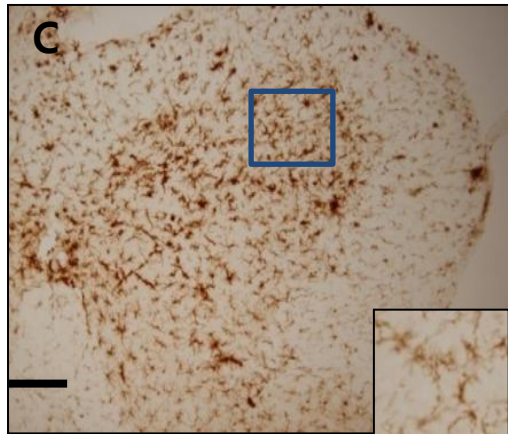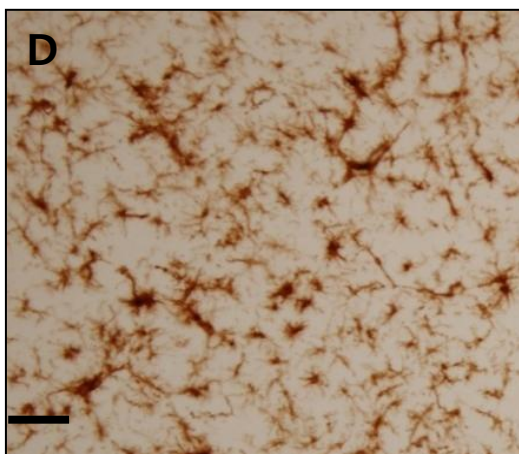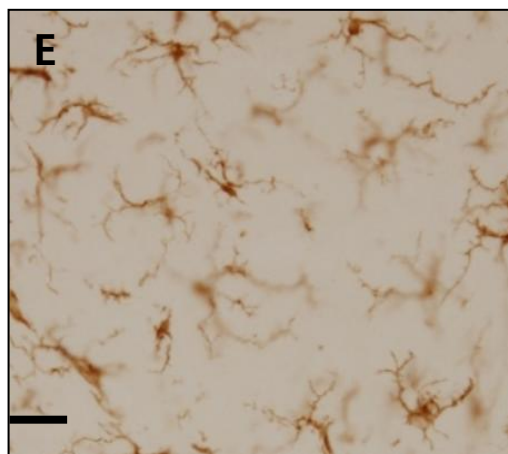**F**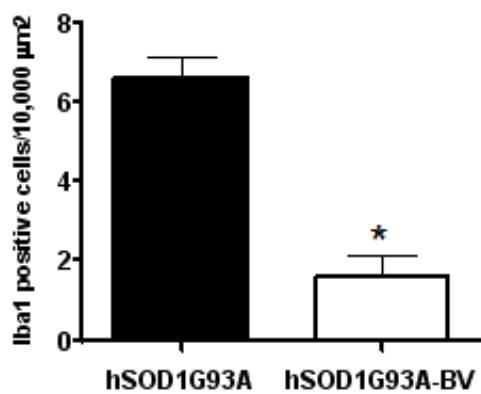**G**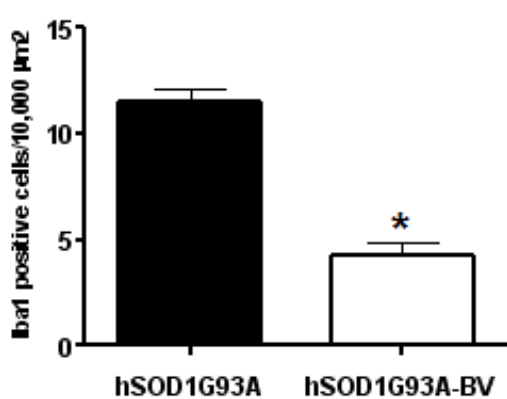

Supplement: MOESM4 [file 9601154]
